# Supplementary material for: Development of Novel Magnetoliposomes Containing Nickel Ferrite Nanoparticles Covered with Gold for Applications in Thermotherapy
Source: Materials (Basel). 2020 Feb 11;13(4):815. doi: 10.3390/ma13040815 (PMC7078757; doi:10.3390/ma13040815)
Supplement: Supplementary file 1 [file materials-13-00815-s001.pdf]

## Supplementary Material

# Development of Novel Magnetoliposomes Containing Nickel Ferrite Nanoparticles Covered with Gold for Applications in Thermotherapy

Irina S. R. Rio<sup>1</sup>, Ana Rita O. Rodrigues<sup>1</sup>, Carolina P. Rodrigues<sup>1</sup>, Bernardo G. Almeida<sup>1</sup>, A. Pires<sup>2</sup>, A. M. Pereira<sup>2</sup>, J. P. Araújo<sup>2</sup>, Elisabete M. S. Castanheira<sup>1</sup> and Paulo J. G. Coutinho<sup>1,\*</sup>

## Evidence of stability of NPs dispersions

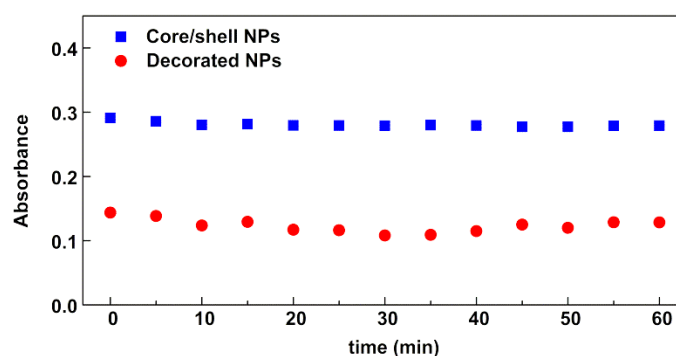

**Figure S1.** UV-Visible maximum absorbance of nanoparticles dispersions in PBS buffer (pH = 7.0) as function of time (5 minutes intervals).

## Fluorescence intensity dependence on temperature in irradiation assays

Assuming an Arrhenius behaviour for the rate constant,  $k_{nr}$ , of non-radiative processes, it is possible to determine the temperature in each irradiation assay,

$$k_{nr} = k_0 e^{-\frac{E_a}{RT}} \quad (S1)$$

where  $k_0$  is the preexponential factor;  $E_a$  is the activation energy,  $R$  the gas constant and  $T$  the absolute temperature.

The fluorescence quantum yield,  $\Phi_F$ , is given by

$$\Phi_F = \frac{k_F}{k_F + k_{nr}} \Rightarrow \frac{1}{\Phi_F} - 1 = \frac{k_{nr}}{k_F} \quad (S2)$$

where  $k_F$  is the fluorescence rate constant.

Taking as reference the fluorescence quantum yield at room temperature,  $\Phi_F^0$ , it is obtained

$$\frac{\Phi_F^0}{\Phi_F} - \Phi_F^0 = \Phi_F^0 \frac{k_{nr}}{k_F} \quad (S3)$$

or, similarly,

$$\frac{I_F^0}{I_F} - \Phi_F^0 = \Phi_F^0 \frac{k_{nr}}{k_F} \quad (S4)$$

where  $I_F$  represents the fluorescence intensity at a given wavelength.

Therefore, it can be obtained

$$\frac{I_F^0}{I_F} - \Phi_F^0 = \Phi_F^0 \frac{k_0}{k_F} e^{-\frac{E_a}{RT}} \quad (S5)$$

Considering, as an approximation, that the fluorescence quantum yield of Rhodamine B near the nanoparticles is much lower than the quenching ratio,  $\frac{I_F^0}{I_F}$ , that is always above unity, it is obtained:

$$\frac{I_F^0}{I_F} \approx \Phi_F^0 \frac{k_0}{k_F} e^{-\frac{E_a}{RT}} \quad (S6)$$

Or

$$\frac{I_F^0}{I_F} \propto A e^{-\frac{E_a}{RT}} \quad (S7)$$

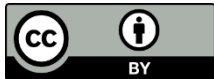

© 2020 by the authors. Submitted for possible open access publication under the terms and conditions of the Creative Commons Attribution (CC BY) license (<http://creativecommons.org/licenses/by/4.0/>).
